# Supplementary material
Source: PubMed Central journal article supplement (PMC3753694)
Supplement: NIHMS461112-supplement-suppl_file1.pdf [file NIHMS461112-supplement-suppl_file1.pdf]

# Sequencing Data Report

## microRNA Sequencing Discovery Service

On

*G2*

For

Dr. Peter Nelson

Sanders-Brown Center on Aging

University of Kentucky

*Prepared by*

*LC Sciences, LLC*

*June 15, 2011*

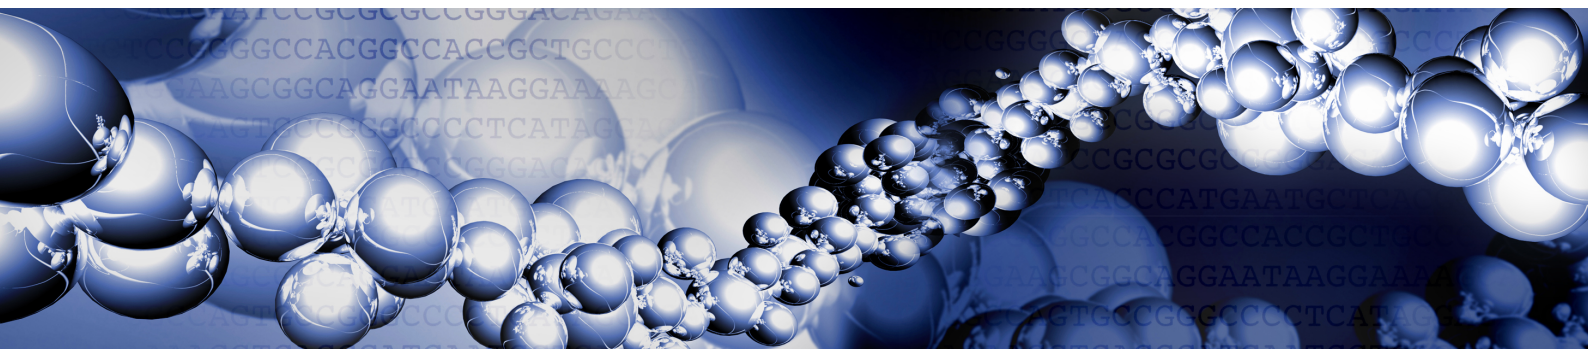

## I. PROJECT INFORMATION

**Table 1.** Sample, service and project tracking information

| <b>A: Project information</b> |                                       |
|-------------------------------|---------------------------------------|
| Customer Sample Name          | G2                                    |
| Sample Species                | <i>Homo sapiens</i>                   |
| Sample Received Date          | 03/21/2011                            |
| Service Requested             | microRNA Discovery Sequencing Service |
| LCS Project Number            | 4372                                  |
| LCS Sample ID                 | G2                                    |

| <b>B: Database information</b>  |                                                                                                                                                                                                  |                       |
|---------------------------------|--------------------------------------------------------------------------------------------------------------------------------------------------------------------------------------------------|-----------------------|
| Reference or Database Sequences | WEblink and Information                                                                                                                                                                          | Version or Built Date |
| miRNA(miRs) database            | ftp://mirbase.org/pub/mirbase/CURRENT/;<br>Specific species: hsa; Selected species: ssc, cfa, mdo, age, lla, sla, mml, mne, pbi, ggo, ppa, ptr, ppy, ssy, lca, oan, cgr, mmu, rno, bta, eca, oar | v17.0                 |
| Pre-miRNA(mirs) database        | ftp://mirbase.org/pub/mirbase/CURRENT/;<br>Specific species: hsa; Selected species: ssc, cfa, mdo, age, lla, sla, mml, mne, pbi, ggo, ppa, ptr, ppy, ssy, lca, oan, cgr, mmu, rno, bta, eca, oar | v17.0                 |
| Genome database                 | ftp://ftp.ncbi.nih.gov/genomes/H_sapiens/                                                                                                                                                        | 37.1                  |
| mRNA database                   | ftp://ftp.ncbi.nih.gov/genomes/H_sapiens/RNA/                                                                                                                                                    | 37.1                  |
| Customer database               | NA                                                                                                                                                                                               | NA                    |

## II. DATA REPORT

### A. Terminologies Used

**Table 2.** Terminologies used in data analysis

| <b>Term</b>          | <b>Description</b>                                                                                                                                            |
|----------------------|---------------------------------------------------------------------------------------------------------------------------------------------------------------|
| Copy Number or Count | Number of sequ seqs in the same unique seq family                                                                                                             |
| Mapping              | Blasting a sequence to a reference database                                                                                                                   |
| miRBase              | A searchable database of published miRNA sequences and annotation; <a href="http://mirbase.org">http://mirbase.org</a>                                        |
| mir                  | Pre-miRNA registered in miRBase                                                                                                                               |
| miR                  | Mature miRNAs registered in miRBase                                                                                                                           |
| RepBase              | Prototypic sequences representing repetitive DNA from different eukaryotic species; <a href="http://www.girinst.org/rebase">http://www.girinst.org/rebase</a> |
| RFam                 | Collection of many common non-coding RNA families except micro RNA; <a href="http://rfam.janelia.org">http://rfam.janelia.org</a>                             |
| Reads                | DNA sequences from reading of sequencing instruments                                                                                                          |
| Sequ Seq or Reads    | Raw sequencing reads generated in after image extraction and base-calling                                                                                     |
| Unique Seq           | Family of sequ seq with same sequence                                                                                                                         |
| Selected species     | A combination of species defined by user                                                                                                                      |
| Specific species     | Species of the sample analyzed                                                                                                                                |

## **B. Methods and Procedures**

The received RNA sample was processed to generate a cDNA library which was then used to deep sequencing. The data generated were analyzed and the full data files were saved onto a DVD disc which is included in this report. Experimental procedures and analysis methods are briefly presented here and detailed descriptions are documented in Appendix I.

**Raw reads: 12,510,211**

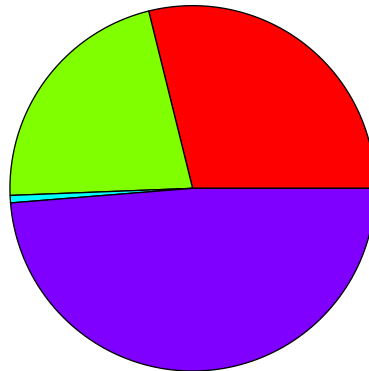

|   |                                                                            |
|---|----------------------------------------------------------------------------|
| ■ | Number of reads removed due to 3ADT not found: 3,611,417 (28.9%)           |
| ■ | Number of reads removed due to <15 bases after 3ADT cut: 2,721,446 (21.8%) |
| ■ | Junk reads: 81,529 (0.7%)                                                  |
| ■ | Number of mappable reads: 6,095,819 (48.7%)                                |

**Number of mappable reads: 6,095,819**

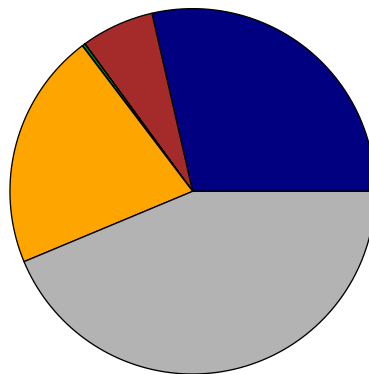

|   |                                                            |
|---|------------------------------------------------------------|
| ■ | Gp1a: 1,742,173 (28.6%)                                    |
| ■ | Gp1b: 393,838 (6.5%)                                       |
| ■ | Gp2: 135 (0%)                                              |
| ■ | Gp3: 15,878 (0.3%)                                         |
| ■ | Gp4: 1,310 (0%)                                            |
| ■ | Others (mapped to mRNA, RFam, or repbase): 1,278,014 (21%) |
| ■ | Nohit: 2,664,471 (43.7%)                                   |

**Figure 1.** Pie plots of data filtering and database mapping

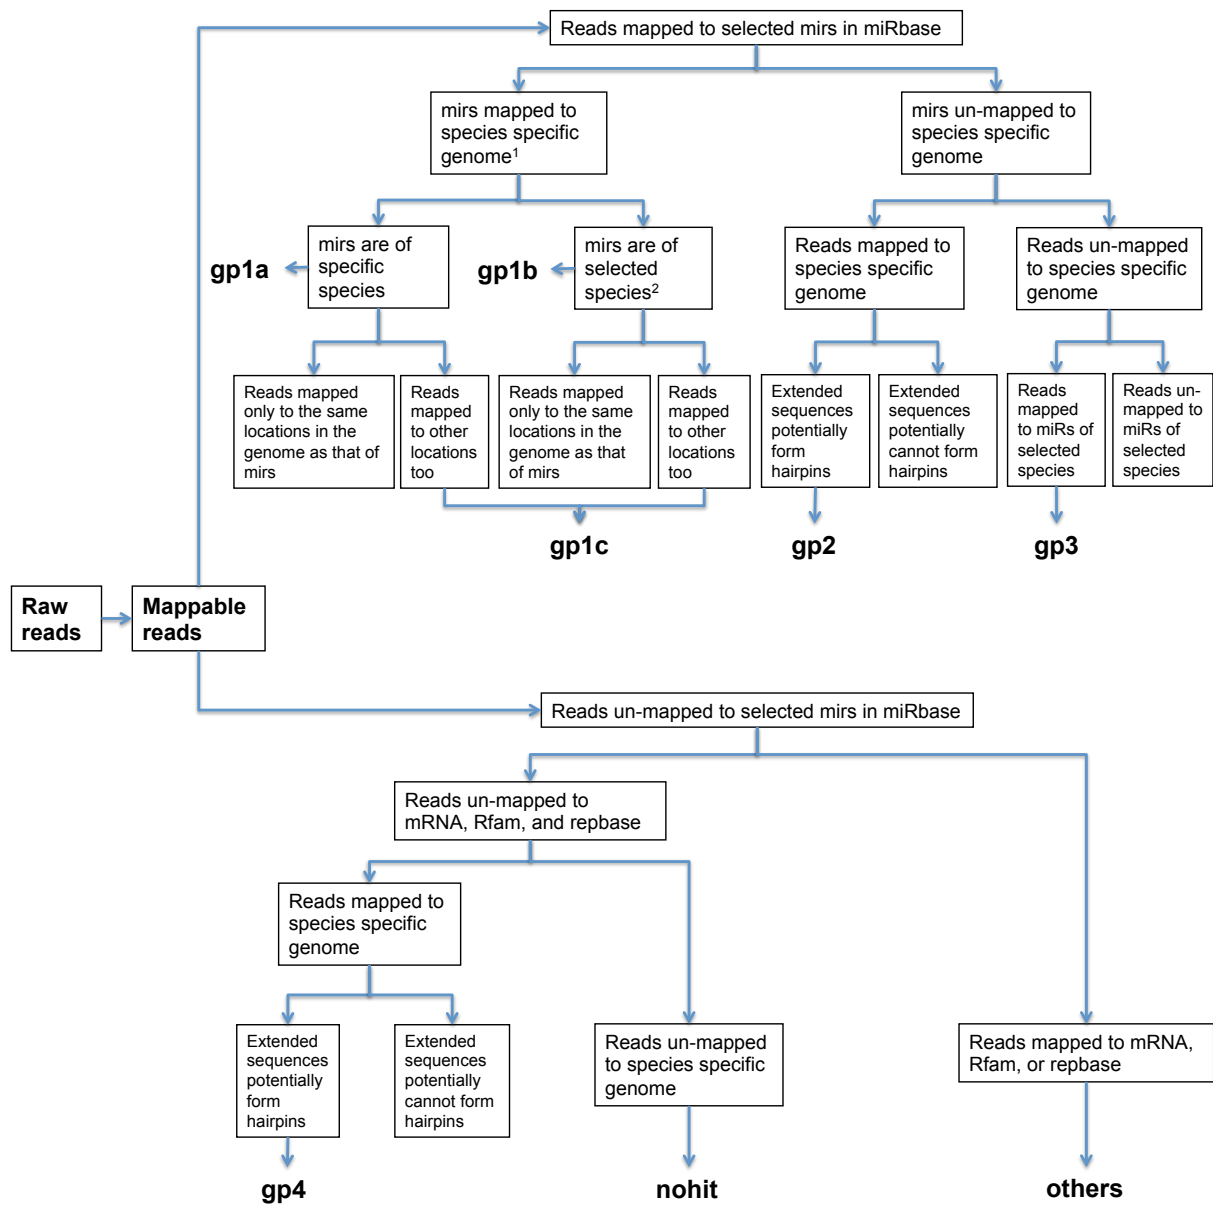

Figure 2. Data analysis flowchart

<sup>1</sup> *Homo sapiens*

<sup>2</sup> Mammalian

### III. DATA SUMMARIES

#### A. List of Data Files

**Table 4.** Data files delivered and programs recommended for reviewing

| Folder          | Data Files             | Reviewing Program |
|-----------------|------------------------|-------------------|
| 1_RawData       | G2_RawData.fq (zipped) | Wordpad           |
| 2_ProcessedData | G2_unique.fq           | Wordpad           |
|                 | G2_mappableReads.fq    | Wordpad           |
| 3_MappedData    | G2_gp1a_aln.txt        | Wordpad           |
|                 | G2_gp1a_sum.txt        | Excel             |
|                 | G2_gp1b_aln.txt        | Wordpad           |
|                 | G2_gp1b_sum.txt        | Excel             |
|                 | G2_gp2_aln.txt         | Wordpad           |
|                 | G2_gp2_sum.txt         | Excel             |
|                 | G2_gp3_aln.txt         | Wordpad           |
|                 | G2_gp3_sum.txt         | Excel             |
|                 | G2_gp4_aln.txt         | Wordpad           |
|                 | G2_gp4_sum.txt         | Excel             |
|                 | G2_mir_aln.txt         | Wordpad           |
|                 | G2_mir_sum.txt         | Excel             |
|                 | G2_others.txt          | Excel             |
|                 | G2_nohit.fq            | Wordpad           |
| 4_Summary       | G2_uni_miRs.txt        | Excel             |

**B. Length Distribution of Reads after 3ADT cut**

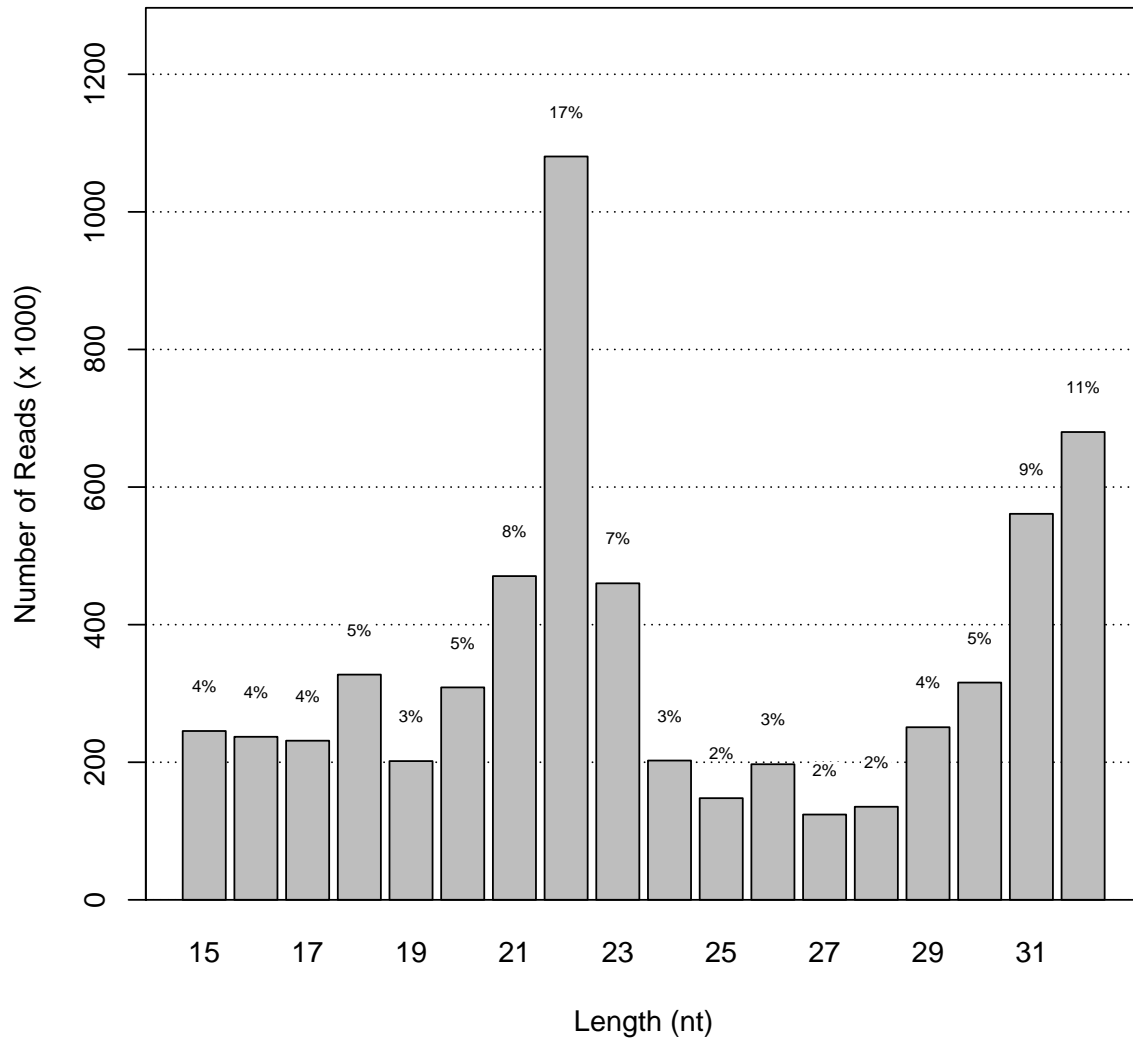

**Figure 3.** Length distribution of reads after 3ADT cut



**Table 5.** Length distribution of reads after 3ADT cut

| Length | #SequSeq  | %Total |
|--------|-----------|--------|
| 15     | 245,414   | 4%     |
| 16     | 237,045   | 3.8%   |
| 17     | 231,260   | 3.7%   |
| 18     | 327,351   | 5.3%   |
| 19     | 201,740   | 3.3%   |
| 20     | 308,794   | 5%     |
| 21     | 470,625   | 7.6%   |
| 22     | 1,080,496 | 17.5%  |
| 23     | 460,137   | 7.4%   |
| 24     | 202,489   | 3.3%   |
| 25     | 147,791   | 2.4%   |
| 26     | 197,065   | 3.2%   |
| 27     | 124,010   | 2%     |
| 28     | 135,324   | 2.2%   |
| 29     | 250,878   | 4.1%   |
| 30     | 315,826   | 5.1%   |
| 31     | 561,145   | 9.1%   |
| 32     | 679,958   | 11%    |
| Total  | 6,177,348 | 100%   |

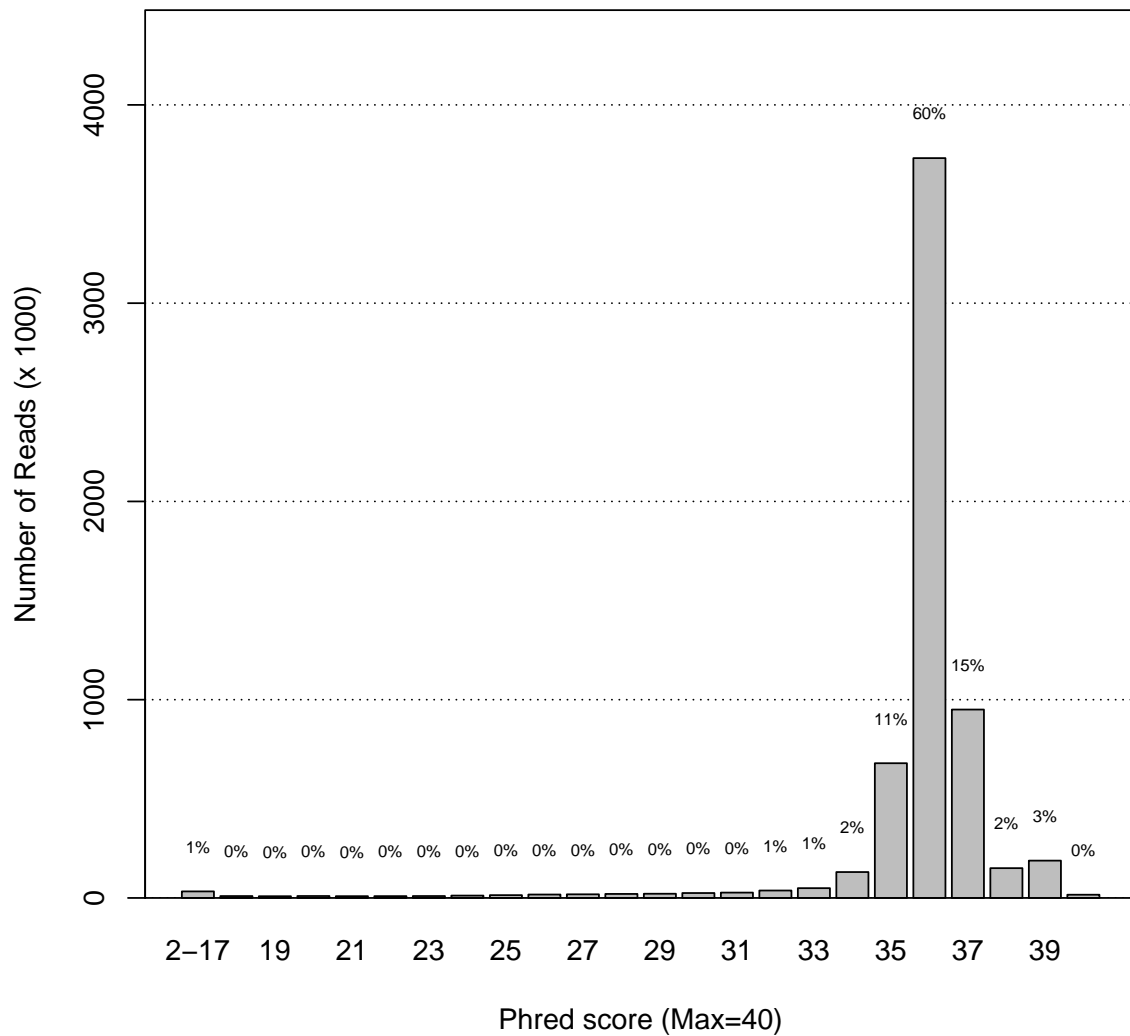

**Figure 4.** Histogram of the average phred score<sup>1</sup> per base in a read after 3ADT cut

<sup>1</sup> Phred score larger than 30 stands for probability of incorrect base calls less than 1 in 1,000 (above 99.9% accuracy) in one sequencing read.

### C. Results Summary

**Table 6.** A summary of standard data analysis results

|                                                                            | #Seqseq    | %Mappable SequSeq |
|----------------------------------------------------------------------------|------------|-------------------|
| Raw                                                                        | 12,510,211 |                   |
| Total mappable reads                                                       | 6,095,819  | 100%              |
| Group 1a                                                                   | 1,742,173  | 28.6%             |
| Group 1b                                                                   | 393,838    | 6.5%              |
| Group 1c                                                                   | 1,058,650  | 17.4%             |
| Group 2                                                                    | 135        | 0%                |
| Group 3                                                                    | 15,878     | 0.3%              |
| Group 4                                                                    | 1,310      | 0%                |
| Mapped to mRNA                                                             | 545,346    | 8.9%              |
| Mapped to other RNAs<br>(RFam: rRNA, tRNA,<br>snRNA, snoRNA and<br>others) | 1,252,583  | 20.5%             |
| Mapped to Repbase                                                          | 35,325     | 0.6%              |
| Mapped to custom<br>database if applicable                                 | 0          | 0%                |
| Nohit                                                                      | 2,664,471  | 43.7%             |

**Table 7.** Known and predicted miRs

|                                                                                 | Group    | #Unique miRs |
|---------------------------------------------------------------------------------|----------|--------------|
| Known miRs                                                                      |          |              |
| of specific species <sup>1</sup>                                                | Group 1a | 951          |
| of selected species <sup>2</sup> , but novel to specific species                | Group 1b | 145          |
| of specific and selected species, but with new genome <sup>1</sup><br>locations | Group 1c | 589          |
| Predicted miRs                                                                  |          |              |
| Mapped to known miRs of selected species and<br>genome; within hairpins         | Group 2  | 23           |
| Mapped to known miRs of selected species but un-<br>mapped to genome            | Group 3  | 162          |
| UmMapped to known miRs but mapped to genome<br>and within hairpins              | Group 4  | 383          |
| Overall (Unique miRs)                                                           |          | 1,442        |

<sup>1</sup> *Homo sapiens*

<sup>2</sup> Mammalian
