# Supplementary material
Source: PubMed Central journal article supplement (PMC3753694)
Supplement: NIHMS461112-supplement-suppl_file2.pdf [file NIHMS461112-supplement-suppl_file2.pdf]

|                                |
|--------------------------------|
| Legend:                        |
| Putative mature miRNA sequence |
| Seed sequences                 |
| Conserved region               |
| Exons                          |
| Start/end of aligned region    |
| Start/Stop codon               |

## 21nt putative miRNAs

### PC-3p-10838

Chr 9:138265495-138265568

```

homo_sapiens      ACCCGAGCTTGTACAAAGTC-GGGGGACCTGGGGTCTCCTCTCTCTCTCTCCCCCGTCCCAGGCTGTCCCTTC
pan_troglodytes  ACCCGAGCTTGTACAAAGTC-GGGGGACCTGGGGTCTCCTCTCTCTCTCTCCCCACTCCCCAGGCTGTCCCTTC
gorilla_gorilla  ACCCGAGCTTGTACAAAGTC-GGGGGACCTGGGGTCTCCTCTCTCTCTCTCCCCACTCCCCAGGCTTTCCTTC
macaca_mulatta   GCCACAGCTTGTACCAAGTTGGGGGACCTAGGGTCTCCTCTCTCTCTCTCCCCACTCCCCAGGCTGTCCCTTC
canis_familiaris GCC--AGGTTCT-----GG--CCCTGGTGTGCCCTCTCTGCCACCTGC--CCCAG-----

```

### PC-3p-10179

Chr 20:37076781-37076871

```

homo_sapiens      GGCAGAGGAAATGCGGG-AAAGG-TTG--CTGTGTTGGAGGGTCCACATCTTCACCCTCCTGTCTCAGGCTTTTCCCTACACTCTCCTTCT
pan_troglodytes  GGCAGAGGAAATGCGGG-AAAGG-TTG--CTGTGTTGGAGGGTCCACATCTTCACCCTCCTGTCTCAGGCTTTTCCCTACACTCTCCTTCT
gorilla_gorilla  GGCAGAGGAAATGCGGG-AAAGG-TTG--CTGTGTTGGAGGGTCCACATCTTCACCCTCCTATCTCAGGCTTTTCCCTACACTCTCCTTCT
macaca_mulatta   GGCAGAGGAAATGCGGG-AAAGG-TTG--CCGTGTTGGAGGGTCCACATCTTCACCCTCCTGTCCCGGGAAGCTTCCCTACACTCTCCTTCT
canis_familiaris GGGAGAAGAT-TCAGGGGAGGTTGTCTCTGTTTGGAGGATCCACATCCTCACCTTCC-----AGTTTACCAGTTCATCTTCTC-
mus_musculus     GGCAGAGGAAATGGAAAGAACTGTCCTGTCTGGAAAGTCCACCCATGCCTTCCAATGCTGGGAGCTTTCCACACTATGGTTTCTCA
rattus_norvegicus GGCAGAGGAAATGCGGGGAAAGCTGTCAGTGTGGAAAGTCCACCCATGTCTTCCAATGCTGGGAGCTTTCCACACTGTGCCCTCTCA

```

### PC-3p-177950

Chr2:49456847-49456932

```

homo_sapiens      TCCCAAGGCTCAGAGCACTGCAGCGATCACTCATATTGCTTCCGTGGAGTGTAGCGAGTCAATAACTTTGACGCCGGTGG
pan_troglodytes  .....
gorilla_gorilla  .....
macaca_mulatta   .....

```

### PC-5p-129251

Chr17:2275547-2275646

```

homo_sapiens      CTGTGAGTGTGGGGCG-CGCCGGCTGTGGCGGCTTGGGGGG--CGGGCGGCCCTGGGTCCCAGCCTCCTGTGCCACCCTGTG
pan_troglodytes  CTGTGAGTGTGGGGCAC-GCCGGCTGTGGCGGGCTGGGG--CGGGCGGCCCTGGGTCCCAGCCTCCTGTGCCACCCTGTG
gorilla_gorilla  CTGTGAGTGTGGGGCG-GCTGGCTGTGGCGGGCTGGGG--CGGGCGGCCCTGGGTCCCAGCCTCCTGTGCCA-----
macaca_mulatta   NNNNNNNNNNNNNNNN-NNNNNNNNNNNNNNNNNNNNNN--NN NNNNNNNNNNNNNNNNNNNNNNNNNNNNNNNNNNNNN
canis_familiaris CTGTGAGTATTGGGTGAGGTGGGGCTGTGAGGGTGGGAGAT-CGGGG----AGGTACCAGTGCATATGTCTTCCCTCTG

```

### PC-3p-85254

Chr2:6114784-6114880

```

homo_sapiens      TGTGTGGCCAGGCTCAATCTTGGTCTGCAGCCTTCTGCCTTGGCTTCT-GAAGCGAGCTGAAGTAGAGATTGGGCCAGCTCGCAGCGCAGTT
pan_troglodytes  TGTGTGGCCAGGCTCAATCTTGGTCTGCAGCCTTCTGCCTTGGCTTCT-GAAGCGAGCTGAAGTAGAGATTGGGCCAGCTTGGCAGCGCAGTT
gorilla_gorilla  TGTGTGGCCAGGCTCAATCTTGGTCTGCAGCCTTCTGCCTTGGCTTCT-GAAGCGAGCTGAAGTAGAGATTGGGCCAGCTTGGCAGCGCAGTT
macaca_mulatta   TGTGTGGCCAGCTCCACTCTTGGTCTGTAGCTTCTGCCTTCAAGCTTCT-GAAGGGAGCTGAAGTAGAGATTGGGCCAGCTTGGCAGCGCAGTT
canis_familiaris  AGGGGGCCCGCTGTCTCTCCAGGCC-GCACACTCAGCCTTCTGCTTCTCGAAGCGA--CCAGGCCAGAG-----GCTCAGCTACTCAGTT

```

### PC-3p-200395

Chr1:208042443-208042518

```

homo_sapiens      CCGCTGTCAGGCCGAGATGCGCGGCTGCGGACGCGCGCTCCGCGCGCGCGCTTCCCGGGCGTGTGAGCTCA
pan_troglodytes  CCGCTGTCAGGCCGAGATGCGCGGCTGCGGACGCGCGACTCCGCGCGCGCGCTTCCCGGGCGTGTGAGCTCA
gorilla_gorilla  NNNNNNNNNNNNNNNNNNGCAGGCTGCGGACGCGCGCTCCGCGCGCGCGCTTCCCGGGCGTGTGAGCTCA
macaca_mulatta   CCGCTGTCAGGCCGAGATGCGCGGCTGCGGACGCGCGCTCCGCGCGCGCGCTTCCCGGGCGTGTGAGCTCA
mus_musculus     CCGC-----GGAGGCGCAA-CACTGCGGACTCCGCTTC-----GAGAGCTC-
rattus_norvegicus CCCG-----GGAGGCGCAA-CACTGCGGACTCTGCTTC-----GAGAGCTC-

```

### PC-3p-158423

Chr1:1284683-1284755

```

homo_sapiens      AGCGCGCGAG-AGGGA-CGCAGCCTGCGCGCTCAGCCCCCGCCCTCCGCTTGCCTCCT-CCT-CGGGCGCGG
gorilla_gorilla  NNNNNNNNN-NNNNN-NNNNNNNNNNNNNNNNNNNNNNNNNNNNNNNNNNNNNNNNNNNNNNNNNNNNNNNNNNNNNN
macaca_mulatta   NNNNNNNNN-NNNNN-NNNNNNNNNNNNNNNNNNNNNNNNNNNNNNNNNNNNNNNNNNNNNNNNNNNNNNNNNNNNNN
canis_familiaris  -ATGTCAGC-TGGTC-CGCGCC---GGCCCGCCTCCGTCAGTACTCCACCGACACGCTGACCTACAGGCTCCG

```

### PC-5p-105012

Chr5:108949221-108949263

```

homo_sapiens      GGATGACCTTCCAG--AGTCTTGCAGCTGGAGATCTAAGTTT
pan_troglodytes  GGATAAAGG-GGGG--NNNNNNNNNNAGCTGGAGATCTAAGTTT
gorilla_gorilla  AGATGACCTTCCGG--AGTCTTGCAGCTGGAGATCTAAGTTT
macaca_mulatta   GGATGACCTTTTGG--AGTCTTGTCACTGGAGATCTAAGCTT
canis_familiaris  AGACGACCTTTC-G--AGCGCTGCAAGCTGGAGAGTCTGAGAAT

```

### PC-3p-44509

homo\_sapiens

No specific match

CTACCTGCCTGCAGAAAGGAGCTATCCACTCCAGGTCTCTTTCTTGTGAGAGCTGGAAGTCTGTTGGGATGACCTGCAGGTAGGAGC



## 23nt putative miRNAs

### PC-3p-9185/PC-3p-7047 (same)

Chr16:2156678-2156745

```
homo_sapiens      CCTGCAGGCAGAAAGGGG TGGTGAG GGGGCGCAACCCCTGTGCCCTGTCAGCCCCACTTCTGCCTGCAGG
pongo_abelii     CCTGCAGGCAGAAAGGGG TGGTGAG GGGATCGACCCCTGTGCCCTGTCAGCCCCACTTCTGCCTGCAGG
canis_familiaris GCTGCGGAGCCCCGGGGCGGGGCCGGGTGTCAGGGCGGGGCCCCGAGGACGCTCCCGCCCC-----G
mus_musculus     ACTGTATGATGGAAGCATGGAGGACATGGTGAGAGTGG-----TGTCCTGGATGCTTCCC-----CAGG
rattus_norvegicus GCTGCATGGTGAAGCATGG--AGGGCACG-----GTGAG
```

Chr16:15227931-15227998

```
homo_sapiens      CCTGCAGGCAGAAAGGGG TGGTGA-----GGGGCGCAACCCCTGTGCCCTGTCAGCCCCACTTCTGCCT-GCAGG
canis_familiaris GCTGCGGAGCCCCGGGGCGGGGCCGGGTGTCAGGGCGGGGCCCCGAGGACGCTCCCGCCC..C.....C
mus_musculus     ACTGTATGATGGAAGCATGGAGGACATGGTGAGAGTGG.....
rattus_norvegicus GCTGCATGGTGAAGCATGC.....GTGAG
```

### PC-5p-70745

Chr14:103804171-103804250

```
homo_sapiens      AAACCTGAA-GTATTGCAAGCAACACTCTGTGGCAGATGATCAAAACTGTCTGACACAATTTGAGCTTGCTATAGCAAGAAA
pan_troglodytes  AAACCTGA--GTATTGCAAGCAACACTCTGTGGCAGATGATCAAAACTGTCTGACACAATTTGAGCTTGCTATAGCAAGAAA
macaca_mulatta   AAACCTGA--GCATTGCAAGCAACACTCTGTGGCAGATGATGAAACTGTCTGACACAATTTGAGCTTGCTATAGCAAGAAA
mus_musculus     .....A--GCATTGCAAGCAACACTCTGTGGCAGATGAAACAAACCGCTGACACAATTTGAGCTTGCTATAGCAAGAAA
rattus_norvegicus GACCTTAAA-GCATTGCAAGCAACACTCTGTGGCAGATGAAACAAACTGTCTGACACAATTTGAGCTTGCTATAGCAATAA
gallus_gallus    .....TGCAAGCAACACTCTGTAGTAGCATTTGG--TTGCTGTGCAATTTAAGCTTGCTAAATCAGAAA
```

### PC-3p-84393

Chr7:116660263-116660388

```
homo_sapiens      CCTGCTATTGTCTTACTGCTACAGCAGGGCTGGGGATTGCAGTATCCGCTGTGCTGCTGCCAGTCCGCCCCCTGCTGCTACCTAGTCCAGCCTCACCGCATCCCAGAAGAGCCAGC
pan_troglodytes  CCTGCTATTGTCTTACTGCTACAGCAGGGCTGGGGATTGCAGTATCCGCTGTGCTGCTGCCAGTCCGCCCCCTGCTGCTACCTAGTCCAGCCTCACCGCATCCCAGAAGAGCCAGC
gorilla_gorilla  CCTGCTATTGTCTTACTGCTACAGCAGGGCTGGGGATTGCAGTATCCGCTGTGCTGCTGCCAGTCCGCCCCCTGCTGCTACCTAGTCCAGCCTCACCGCATCCCAGAAGAGCCAGC
macaca_mulatta   CCTGCTATTGTCTTACTGCTACAGCAGGGCTGGGGATTGCAGTATCCGCTGTGCTGCTGCCAGTCCGCCCCCTGCTGCTACCTAGTCCAGCCTCACCGCATCCCAGAAGAGCCAGC
mus_musculus     TCTGCTATTGTCTTACCGCTAGAGCAGGGCTGAGGACTGCAGTCTC----TGCTGCTGCCAGACCTGCCCTGCGTAGTACCTAGCCCTGCTCCTCACTGCATCCCTCAGAGCCG
rattus_norvegicus TCTGCTATTGTCTTACCGCTAGAGCAGGGCTGAGGACTGCAGTCTC----TGCTGCTGCCAGACCTGCCCTGCGTAGTACCTAGCCCTGCTCCTCACTGCATCCCTCAGAGCCG
gallus_gallus    TATGCTATTGTCTTACCG--AGAGCAGGGCTGGGGATTGCAGTATCTGGTGT-----CCGCTACCTATCTTGCC-CGCGC-TCTGCGGGAGCGAGC
```
